# Supplementary material
Source: ML conference proceedings conference paper supplement (https://openreview.net/forum?id=6h7HLx1kbH)
Supplement: supplementary_material [file Uncountable_Generation.pdf › Uncountable_Generation.pdf]

---

# On Union-Closedness of Language Generation

---

Anonymous Author(s)

Affiliation

Address

email

## Abstract

1 We investigate language generation in the limit – a model by Kleinberg and Mullainathan [2024, NeurIPS] and extended by Li, Raman, and Tewari [2024]. While  
2 Kleinberg and Mullainathan proved generation is possible for all countable collections, [Li et al., 2024] defined a hierarchy of generation notions (uniform,  
3 non-uniform, and generatable) and explored their feasibility for uncountable collections. Our first set of results resolve two open questions of [Li et al., 2024] by  
4 proving finite unions of generatable or non-uniformly generatable classes need not be generatable. These follow from a stronger result: there is a non-uniformly  
5 generatable class and a uniformly generatable class whose union is non-generatable.  
6 This adds to the aspects along which language generation in the limit is different  
7 from traditional tasks in statistical learning theory like classification, which are  
8 closed under finite unions. In particular, it implies that given two generators for  
9 different collections, one cannot combine them to obtain a single “more powerful”  
10 generator, prohibiting this notion of boosting. Our construction also addresses a  
11 third of [Li et al., 2024]’s open questions on whether there are uncountable classes  
12 that are non-uniformly generatable and do not satisfy the eventually unbounded  
13 closure (EUC) condition introduced by Li, Raman, and Tewari. Our approach  
14 utilizes carefully constructed classes along with a novel diagonalization argument  
15 that could be of independent interest in the growing area of language generation.  
16  
17  
18  
19

## 20 1 Introduction

21 The algorithmic problem at the core of language generation – in both humans and large language  
22 models (LLMs) – is deceptively simple: given a sequence of examples from some target language,  
23 generate new and previously unseen strings that also belong to this language. Despite the remarkable  
24 capabilities of humans and, perhaps, more so of LLMs, to generate coherent text, a thorough  
25 understanding of the theoretical underpinnings of language generation has remained elusive.

26 **Language Generation in the Limit.** Kleinberg and Mullainathan [2024] recently formalized this  
27 problem in a model resembling online learning: First, an adversary fixes a target language  $K \in \mathcal{L}$   
28 and an enumeration of  $K$ .<sup>1</sup> At each round  $n \geq 1$ , the adversary presents the  $n$ -th element  $x_n$  of  
29 the enumeration to the generator. The generator, given the strings  $S_n = \{x_1, \dots, x_n\}$  seen so far,  
30 outputs a new string  $w_n \notin S_n$  – its guess for an unseen string in  $K$ . The generator wins this game  
31 if it eventually learns “to generate from  $K$ .” Formally, a generator  $G$  is said to generate from  $\mathcal{L}$  in  
32 the limit if for all  $K \in \mathcal{L}$  and any enumeration of  $K$ , there exists a finite time  $n^*$  such that for any  
33 subsequent round  $n \geq n^*$ , the generated string  $w_n$  is an unseen element of  $K$ , i.e.,  $w_n \in K \setminus S_n$ .

34 This model is closely connected to the seminal work of Gold [1967] – which studied the problem with  
35 the harder goal of *identifying* the target language  $K$  from a collection of languages  $\mathcal{L}$  – and sparked a

---

<sup>1</sup>Formally, an enumeration of  $K$  is an infinite sequence of elements  $x_1, x_2, \dots$  (possibly including duplicates) such that each  $x_i \in K$ , and for every element  $x \in K$  there is some position  $n_x$  in the sequence where  $x$  appears.

long line of work both in linguistics and computer science, culminating in a complete characterization by Angluin [1979, 1980]. This characterization revealed a profound paradox: while language generation is readily accomplished by humans (and now, LLMs), language identification in the Gold–Angluin model proves intractable for virtually all non-trivial collections  $\mathcal{L}$  – even collections of regular languages, which are considerably simpler than human languages. This intractability persists despite Gold’s model imposing no constraints on the computational power of the learner.

Kleinberg and Mullainathan [2024] offer a striking resolution to this paradox: they demonstrated that a subtle shift in the problem formulation – from identification to generation – renders the problem tractable. Their main result is that language generation in the limit is achievable for *any* countable collection of languages. This remarkable finding sparked significant interest within the learning theory community, spawning a growing line of works (e.g., Li et al. [2024], Kalavasis et al. [2025], Charikar and Pabbaraju [2024b], Raman and Raman [2025]); see Section 1.2 for a detailed discussion.

Most relevant to our work is the work of Li et al. [2024] – who take a learning theory perspective on language generation in the limit (henceforth, simply language generation) – allowing  $\mathcal{L}$  to be an uncountable collection – and characterizing which collections  $\mathcal{L}$  are amenable to different forms of generation. In particular, they define a hierarchy of generation notions which differ in whether the number of samples  $n^*$  that are needed to achieve consistent generation depends on the target language  $K \in \mathcal{L}$  or its enumeration. In decreasing order of hardness, these notions are:

- ▷ **Uniform Generation** where  $n^*$  neither depends on  $K$  nor its enumeration; it only depends on  $\mathcal{L}$
- ▷ **Non-uniform Generation** where  $n^*$  can depend on  $\mathcal{L}$  and  $K$  but not  $K$ ’s enumeration
- ▷ **Generation** where  $n^*$  can depend on  $\mathcal{L}$ ,  $K$ , and  $K$ ’s enumeration

Here, the weakest notion – generation – is the one studied by Kleinberg and Mullainathan [2024].

**Our Main Questions.** In their work, Li et al. [2024] demonstrated that the problem of generation, under any of these notions, is fundamentally distinct from prediction and the PAC learning framework: they constructed several classes that are generatable but not PAC learnable and vice versa, establishing a clear separation between these paradigms. While these examples illustrate specific differences between prediction and generation, they raise a more profound question: do the conceptual properties of generation differ significantly from those of prediction? One of the most fundamental properties of traditional prediction tasks (such as binary, multiclass, or online classification) is closure under finite unions – if classes  $\mathcal{H}_1$  and  $\mathcal{H}_2$  can be learned (under any of the aforementioned notions of prediction) then so can  $\mathcal{H}_1 \cup \mathcal{H}_2$ . Indeed, this property is at the heart of boosting [Freund and Schapire, 1996, Schapire, 2003, Chen and Guestrin, 2016] and, if true, enables one to combine two or more generators, to obtain more “powerful” and versatile generators. Further, the challenge of effectively combining generators also appears in the work of Kalavasis et al. [2025], where it is a crucial obstacle in establishing tight sample complexity bounds for generation in statistical settings. Although Kalavasis et al. [2025] ultimately circumvent this challenge through alternative techniques, the following fundamental question remains:

- ▷ **Q1.** *Is generation closed under finite unions?*

This was also explicitly posed as a key open problem by Li et al. [2024] (as Questions 6.2) and as a first step in addressing this broader question, they also posed the following more specific variant:<sup>2</sup>

- ▷ **Q2.** *Are finite unions of non-uniformly generatable classes always generatable?*

Apart from differences between generation and prediction, two main results of Li et al. [2024] are complete characterizations of uniform generation and non-uniform generation, respectively. A natural and important question is to develop a complete characterization of generation in the limit. Toward this goal, Li et al. [2024] provide several sufficient conditions. Perhaps the most natural one of these is based on the Eventually Unbounded Closure (EUC) property (see Definition 2.7). Informally, a collection  $\mathcal{L}$  satisfies the EUC property if for any target language  $K \in \mathcal{L}$ , after seeing a finite number of elements  $x_1, x_2, \dots, x_n \in K$ , all languages  $L \in \mathcal{L}$  consistent with  $x_1, x_2, \dots, x_n$  share infinitely many elements. (In other words, all languages in the “version space” defined by  $x_1, x_2, \dots, x_n$  share

<sup>2</sup>Li et al. [2024] show finite unions of uniformly generatable classes are generatable but need not be non-uniformly generatable.

infinitely many elements for large enough  $n$ .) Further, Li et al. [2024] observed that the EUC property is connected to a certain “autoregressive” property where, after seeing finitely many samples, the generator no longer needs to observe further samples to generate new and unseen examples in the future. Given the central role of EUC in current approaches to characterizing generatability and its connection to the autoregressive property, Li et al. [2024] pose the following question:

▷ **Q3.** *Is there a non-uniformly generatable and uncountable class violating the EUC property?*

## 1.1 Our Contributions

We present a family of constructions and corresponding techniques that resolve three open questions of Li et al. [2024] in the model of language generation of Kleinberg and Mullainathan [2024].

▷ **Non-Closure Under Finite Unions:** Our first result constructs two collections  $\mathcal{L}_1$  and  $\mathcal{L}_2$  that are generatable individually, while their union  $\mathcal{L}_1 \cup \mathcal{L}_2$  is not, answering **Question 1** negatively (Theorem 3.1). This construction relies on specific properties relating the two collections (which we explain later; Section 3.4), allowing us to develop a family of counterexamples – demonstrating that the failure of union-closedness is not isolated but an inherent property of language generation that fundamentally distinguishes it from traditional prediction tasks. In particular, we can also ensure that  $\mathcal{L}_1$  and  $\mathcal{L}_2$  are both non-uniformly generatable, hence, also resolving **Question 2**.

▷ **A Minimal Pair of Classes Whose Union Is Not Generatable:** Next, we investigate the spectrum between known extremes: at one end, Kleinberg and Mullainathan [2024] showed that unions of countable collections are generatable; at the other end, our first result (Theorem 3.2) shows that unions of uncountable generatable collections need not be generatable. Our second result, refines this understanding by constructing a countable collection  $\mathcal{L}'_1$  and an uncountable collection  $\mathcal{L}'_2$  whose union is not generatable. Notably, in this construction,  $\mathcal{L}'_1$  is non-uniformly generatable and  $\mathcal{L}'_2$  is uniformly generatable (both without requiring to get any examples from the target language), yet their union  $\mathcal{L}'_1 \cup \mathcal{L}'_2$  is not generatable (Theorem 3.2). This observation shows that the construction is minimal in the sense that simplifying either collection further (by, e.g., making  $\mathcal{L}'_1$  to be uniformly generatable or  $\mathcal{L}'_2$  countable) would make the union generatable, due to results of Li et al. [2024], Kleinberg and Mullainathan [2024].

▷ **Non-Uniformly Generatable Collections without EUC:** Our third result (Theorem 3.3) answers **Question 3** by identifying an uncountable collection that is non-uniformly generatable but violates the Eventually Unbounded Closure (EUC) property. This result provides insight into the relationship between non-uniform generatability and the autoregressive property, suggesting that current sufficient conditions for characterizing generation in the limit need to be expanded.

**Technical Novelty.** We now highlight the key technical challenges and innovations in obtaining our results. The problem of studying generatability of unions of classes was previously examined by Li et al. [2024], who showed that countable unions of uniformly generatable classes need not be generatable in the limit. As they note, their result “showcases the hardness of characterizing generatability in the limit.” Their construction is highly sophisticated, involving a countable list of collections  $\mathcal{L}_1, \mathcal{L}_2, \dots$ , each defined by a different prime number. In this construction, they are able to ensure that the union,  $\bigcup_i \mathcal{L}_i$ , was sufficiently complex that it ends up being non-generatable. This is achievable because they take unions of countably many classes – an operation under which even standard prediction tasks in learning theory (such as binary and multi-class classification) are not closed.<sup>3</sup>

A key challenge in our work is that we consider unions of just two classes. These two classes must simultaneously possess enough structure to be individually generatable, yet become sufficiently complex when combined that their union is not generatable in the limit. Our result in Theorem 3.2 is even more surprising, as it demonstrates this phenomenon with one class being (trivially) uniformly generatable and the other being countable. Our construction relies on several careful choices that we outline below and elaborate on in Section 3.4.

**Overview of Diagonalization.** The only method for proving non-generatability is *diagonalization* [Li et al., 2024, Charikar and Pabbaraju, 2024b, Kalavasis et al., 2024]. This approach is also fundamental in computational complexity theory [Arora and Barak, 2009]. At a very high

<sup>3</sup>Indeed, one can construct a countable union of classes where the  $i$ -th class has VC dimension  $i$ , so that the countable union necessarily has infinite VC dimension, rendering it unlearnable.

level, using diagonalization one constructs, for any consistent generator, an adversarial enumeration of the target language with distinct “phases”  $t_1, t_2, \dots$  such that in the  $i$ -th phase, the generator must generate from language  $L_i$  (and not from languages  $L_{i+1}, L_{i+2}, \dots, L_\infty = K$ ). Consequently, either the generator fails to be consistent in one phase (failing to generate from  $L_i$ ), or we identify infinite steps where it fails to generate from  $K = L_\infty$ .

*Challenges in Using Diagonalization with Finite Unions.* When applying this argument to two collections, we must partition the languages  $L_1, L_2, \dots$  between our collections,  $\mathcal{L}_1$  and  $\mathcal{L}_2$ . However, this causes a problem: by the Pigeonhole principle, at least one collection must contain infinitely many of these languages. Typically, this would allow us to reproduce a similar diagonalization argument, showing that the corresponding collection (say  $\mathcal{L}_1$ ) is itself not generatable – contradicting our goal. (Note that Li et al. [2024] avoid this problem by using countably many collections, assigning language  $L_i$  to collection  $\mathcal{L}_i$  – ensuring that each collection only has a single language from  $L_1, L_2, \dots$ .)

*Idea 1 (Embedding A Shared Structure).* To overcome this challenge, we divide the languages into two sets  $L_1, L_3, L_5, \dots$  and  $L_2, L_4, L_6, \dots$ , embed a shared structure across each set of languages, and assign the sets to the collections  $\mathcal{L}_1 = \{L_1, L_3, L_5, \dots\}$  and  $\mathcal{L}_2 = \{L_2, L_4, L_6, \dots\}$  respectively. For instance, one form of structure is to ensure that  $L_1, L_3, L_5, \dots \supseteq \mathbb{Z}_+$  (all odd-indexed languages contain all positive integers) and  $L_2, L_4, L_6, \dots \supseteq \mathbb{Z}_-$  (all even-indexed languages contain all negative integers). This structure prevents the diagonalization argument from working independently on either  $\mathcal{L}_1$  or  $\mathcal{L}_2$ .

This approach, however, introduces a new challenge: it potentially prevents diagonalization from working on  $\mathcal{L}_1 \cup \mathcal{L}_2$  as well. For example, a generator could determine whether it is in the “even world” (where  $K \supseteq \mathbb{Z}_-$ ) or the “odd world” (where  $K \supseteq \mathbb{Z}_+$ ) by comparing the length of observed prefixes of negative integers versus positive integers. (We make this argument formal in Section 3.4.)

*Idea 2 (Omitting Shared Elements).* To prevent such identification, we need to ensure that after seeing only finitely many elements, every even-indexed language consistent with the enumerated stream is sufficiently similar to some odd-indexed language, and vice-versa. In the context of our running example, to do that we allow each language  $L_i$  to omit finitely many elements from its shared set (either  $\mathbb{Z}_+$  or  $\mathbb{Z}_-$ ). This turns out to be sufficient to ensure that the generator cannot identify whether  $K \in \mathcal{L}_1$  or  $K \in \mathcal{L}_2$ .

This idea, however, creates an additional technical hurdle because standard diagonalization leads to the language  $K (= L_\infty)$  missing infinitely many elements from both shared sets (positive and negative integers for  $\mathcal{L}_1$  and  $\mathcal{L}_2$  respectively), meaning it could not belong to either collection, otherwise the corresponding collection would be non-generatable.

*Idea 3 (A Variant of Diagonalization).* Our third innovation is a novel form of diagonalization where, counter-intuitively, the adversary forces the generator to make mistakes only in alternate rounds. This approach carefully balances the constraints to ensure that (1) both collections remain generatable individually, (2) their union is not generatable, and (3) the final language  $K$  enumerated during diagonalization belongs to one of the collections.

We believe this novel diagonalization technique will have broader applications in the study of language generation, potentially paving the way toward a complete characterization of generatability in the limit – addressing the main open question in this research area identified by Li et al. [2024].

## 1.2 Related Work

Our work directly builds on the framework of Kleinberg and Mullainathan [2024], who introduced the model of language generation in the limit. Since then, a growing line of research has explored various aspects of language generation (e.g., Li et al. [2024], Kalavasis et al. [2025], Charikar and Pabbaraju [2024a], Raman and Raman [2025], Peale et al. [2025], Kleinberg and Wei [2025]). Here, we discuss the most relevant prior works.

**Uniform and Non-Uniform Generation.** Li et al. [2024] introduced a hierarchy of three notions of generation – uniform, non-uniform, and generatable – and provided characterizations for uniform and non-uniform generation along with sufficient conditions for generatability. Charikar and Pabbaraju [2024b] also, independently and concurrently, studied non-uniform generation and showed that all countable collections can be non-uniformly generated, strengthening the results of Kleinberg and Mullainathan [2024] (which only showed that countable collections are generatable and finite collections are uniformly generatable).

**Language Generation with Breadth.** While Kleinberg and Mullainathan’s algorithm eventually ceases outputting elements outside of  $K$  after finite time (*i.e.*, it eventually stops hallucinating), this property comes at a cost: the algorithm sacrifices *breadth* – *i.e.*, the ability to generate diverse strings from the target language. A number of works study language generation with different notions of breadth and demonstrate that requiring many natural notions of breadth makes generation significantly harder, almost as hard as language identification Kalavasis et al. [2025], Charikar and Pabbaraju [2024b], Kalavasis et al. [2024], Peale et al. [2025], Kleinberg and Wei [2025].

**Further work on Language Generation.** Recent works have also explored several other aspects of language generation. Raman and Raman [2025] investigated language generation in a model where an adversary can introduce errors in the inputs, developing a robust framework for noisy settings. Karbasi et al. [2025] explored the complexity of determining if a specific generator  $\mathcal{G}$  is hallucinating.

**Union-Closedness of Prediction.** Understanding the behavior of learning problems such as binary classification and online learning under various natural operations on the underlying hypothesis class, *e.g.*, finite unions, intersections, and products, is a fundamental challenge that is now well-understood in the literature – see, *e.g.*, Van Der Vaart and Wellner [2009], Alon et al. [2020], Ghazi et al. [2021] and references therein. Notably, these properties also reveal natural learning strategies: one can decompose the underlying class into simpler ones, learn them separately, and “combine” the learners.

## 2 Preliminaries

In this section, we present some background on language generation in the limit.

**Notation.** Let  $\Sigma$  be a finite alphabet (*e.g.*,  $\{a, b, \dots, z\}$ ), and  $\Sigma^*$  the set of all finite-length strings formed by concatenating symbols from  $\Sigma$ . We define a language  $L$  as an infinite subset of  $\Sigma^*$ . A collection of languages is denoted by  $\mathcal{L}$ . We define a generating algorithm  $\mathcal{G} = (\mathcal{G}_n)_{n \in \mathbb{N}}$  as a sequence of mappings  $\mathcal{G}_n: (\Sigma^*)^n \rightarrow \Sigma^*$  parametrized by the input size  $n$ . In words, the generator maps a finite training set to a (potentially infinite) set of elements.<sup>4</sup>

**Language Generation in the Limit.** We begin with the formal definition of language generation in the limit, introduced by Kleinberg and Mullainathan [2024].

**Definition 2.1** (Language Generation in the Limit [Kleinberg and Mullainathan, 2024]). *Fix some  $K$  from the language collection  $\mathcal{L}$  and a generating algorithm  $\mathcal{G} = (\mathcal{G}_n)$ . At each step  $n$ , let  $S_n \subseteq K$  be the set of all strings that the algorithm  $\mathcal{G}$  has seen so far.  $\mathcal{G}$  must output a string  $w_n \notin S_n$  (its guess for an unseen string in  $K$ ). The algorithm  $\mathcal{G}$  is said to generate from  $K$  in the limit if, for all enumerations of  $K$ , there is some  $n^* \in \mathbb{N}$  such that for all steps  $n \geq n^*$ , the algorithm’s guess  $w_n$  belongs to  $K \setminus S_n$  (or  $K \setminus S_n$  is empty). The collection  $\mathcal{L}$  allows for generation in the limit if there is an algorithm  $\mathcal{G}$  that generates from  $K$  in the limit for any  $K \in \mathcal{L}$ .*

To gain some intuition about this definition, consider the collection  $\mathcal{L} = \{\mathbb{Z}, L_1, L_{-1}, L_2, L_{-2}, \dots\}$  of thresholds over integers where, for each  $i \in \mathbb{Z}$ ,  $L_i = \{i, i+1, i+2, \dots\}$ . Suppose the target language is some  $K \in \mathcal{L}$  and the adversary first enumerates string  $x_1$ . The generator can deduce that  $K = L_z$  for some  $z \leq x_1$ , *i.e.*,  $K \in \{\mathbb{Z}, L_{x_1}, L_{x_1-1}, \dots\}$ . Since the intersection of all of these languages is non-empty and is a strict superset of the strings enumerated so far (namely, the intersection is  $\{x_1+1, x_1+2, \dots\}$ ), the generator can generate an element that is guaranteed to be in  $K$ : for instance, it is sufficient to output  $x_1+1$ . More generally, after seeing strings  $x_1, x_2, \dots, x_i$ , the generator can output any integer larger than  $\max\{x_1, x_2, \dots, x_i\}$ .

**Remark 2.2.** For the problem to be interesting, we assume that each language in the collection has infinite cardinality, *i.e.*,  $|L| = \infty$  for all  $L \in \mathcal{L}$ . (Otherwise,  $K \setminus S_n$  eventually becomes empty.)

**Remark 2.3** (Repetitions). For simplicity, we throughout also assume that the adversary is not allowed to repeat strings in its enumeration. Otherwise, to define uniform and non-uniform generatability, we have to count the number of unique elements listed by the adversary [Li et al., 2024].

Kleinberg and Mullainathan [2024] showed that language generation in the limit is possible for all countable collections of languages – starkly contrasting results in language identification.

**Uniform and Non-Uniform Generation in the Limit.** Next, we present two strengthenings of the notion of generation in the limit introduced by Li et al. [2024]. The first notion is the strongest, it

<sup>4</sup>While Kleinberg and Mullainathan [2024] required outputting only one element at a time, Kalavasis et al. [2025], Charikar and Pabbaraju [2024a] relaxed this to allow for case where, at some finite point, one can stop training and generate a rich set of responses.

requires the number  $n^*$  in Definition 2.1 (which is the number of samples required by the generator before it starts generating consistently) to be independent of the target language and its enumeration.

**Definition 2.4** (Uniform Generation [Li et al., 2024]). *A collection  $\mathcal{L}$  is said to be uniformly generatable, if there is an algorithm  $\mathcal{G}$  and  $n^*$  such that, for each  $K \in \mathcal{L}$  and each (adversarially chosen) enumeration  $E_K$  of  $K$ ,  $\mathcal{G}$  generates from  $K$  in the limit after seeing  $n \geq n^*$  examples from  $K$ .*

The non-uniform generation weakens this notion by allowing  $n^*$  to depend on the target language.

**Definition 2.5** (Non-Uniform Generation [Li et al., 2024]). *A collection  $\mathcal{L}$  is said to be non-uniformly generatable, if there is an algorithm  $\mathcal{G}$  such that, for each  $K \in \mathcal{L}$ , there is a number  $n^* = n^*(K)$  such that for any (adversarially chosen) enumeration  $E$  of  $K$ ,  $\mathcal{G}$  generates from  $K$  in the limit after seeing  $n \geq n^*$  examples from  $K$ .*

Li et al. [2024] provide characterizations for both the collections that are uniformly and non-uniformly generatable, respectively. These, in particular, show that all countable collections are non-uniformly generatable; a result independently and concurrently also shown by Charikar and Pabbaraju [2024b]. They also show that all finite collections are uniformly generatable in the limit; a result that was also earlier shown by Kleinberg and Mullainathan [2024].

A key remaining question, after these works, is a characterization for the weakest notion of generation in the limit in Definition 2.1; where  $n^*$  can depend on both  $K$  and  $E_K$ . Next, we define the eventually unbounded closure property, which forms the basis of a sufficient condition for generatability proposed by Li et al. [2024].

**Definition 2.6** (Version Space). *Given a finite sequence of strings  $X = \{x_1, \dots, x_n\}$  and a collection  $\mathcal{L}$ , let  $V(\mathcal{L}, X)$  be the set of languages  $L \in \mathcal{L}$  containing  $X$ .*

**Definition 2.7** (Eventually Unbounded Closure). *A collection  $\mathcal{L}$  is said to have the Eventually Unbounded Closure (EUC) property if, for every  $L \in \mathcal{L}$  and enumeration  $x_1, x_2, \dots$  of  $L$ , there is a finite time  $t$ , at which all languages in  $V(\mathcal{L}, \{x_1, x_2, \dots, x_t\})$  share infinitely many elements.*

It is not too hard to show that all uniformly generatable collections possess the EUC property, while some generatable collections do not [Li et al., 2024]. The relationship between EUC and non-uniform generatability is less clear, and Li et al. [2024] constructed a countable class that was non-uniformly generatable without the EUC property, but left open whether an uncountable such class exists. Our work resolves this question by demonstrating an uncountable class that is non-uniformly generatable yet lacks the EUC property.

### 3 Our Results and Technical Overview

In this section, we present our results on language generation in the limit, addressing three open questions of Li et al. [2024].

#### 3.1 Non-Closure Under Finite Unions

Our first result demonstrates that generation is not closed under finite unions.

**Theorem 3.1.** *There are uncountable collections  $\mathcal{L}_1, \mathcal{L}_2$  that are non-uniformly generatable while  $\mathcal{L}_1 \cup \mathcal{L}_2$  is not generatable.*

We stress that while each collection is non-uniformly generatable, their union does not just violate non-uniform generatability, it also violates generatability. Thus, Theorem 3.1 resolves both Questions 1 and 2 negatively. Further, the construction in Theorem 3.1 relies on a certain “prefix-realizability” properties between  $\mathcal{L}_1$  and  $\mathcal{L}_2$  (see Appendix C), which enable us to generalize this approach to a family of counterexamples. This demonstrates that the failure of union-closedness is not an isolated phenomenon but rather an inherent property of language generation.

#### 3.2 On Finite Union of Non-Uniformly Generatable Collections

Both collections in Theorem 3.1 are uncountable. This is necessary in part: at least one collection must be uncountable since, otherwise, if both are countable collections, then their union remains countable and, hence, generatable by the results of Kleinberg and Mullainathan [2024]. This naturally raises the question: *must both collections be uncountable for the union to be non-generatable?*

Our second result shows that both collections need not be uncountable. From our family of counterexamples, we identify a pair  $(\mathcal{L}_1, \mathcal{L}_2)$  where  $\mathcal{L}_1$  is countable,  $\mathcal{L}_2$  is uncountable, and their union is not generatable.

**Theorem 3.2.** *There are collections  $\mathcal{L}_1$  and  $\mathcal{L}_2$  for which  $\mathcal{L}_1 \cup \mathcal{L}_2$  is not generatable such that:*

- ▷  $\mathcal{L}_1$  is countable and non-uniformly generatable, without requiring any elements from the adversary
- ▷  $\mathcal{L}_2$  is uncountable and uniformly generatable, without requiring any elements from the adversary.

Thus, Theorem 3.2 establishes that unions of non-uniformly and uniformly generatable classes are not guaranteed to be generatable. Moreover, these collections are minimally complex in the following precise sense: if either collection is any simpler (*i.e.*, if  $\mathcal{L}_1$  is uniformly generatable or  $\mathcal{L}_2$  is countable), then  $\mathcal{L}_1 \cup \mathcal{L}_2$  would be generatable. When  $\mathcal{L}_1$  is uniformly generatable this is due to a result of Li et al. [2024] which shows that unions of uniformly generatable classes are generatable. When  $\mathcal{L}_2$  is countable, this is due to a result of Kleinberg and Mullainathan [2024] showing that all countable collections are generatable.

Furthermore, even among non-uniformly generatable and uniformly generatable classes,  $\mathcal{L}_1$  and  $\mathcal{L}_2$  represent the simplest collections because they can be generated without observing any elements from the adversary. In the terminology of Li et al. [2024], this enables “autoregressive” generation – where the generator can produce new elements without requiring input from the adversary.

Finally, since  $\mathcal{L}_1$  is countable it can be expressed as a union of singletons  $\mathcal{L}_1 = \bigcup_{i=1}^{\infty} \{L_i\}$ . Since each singleton is trivially uniformly generatable, Theorem 3.2 provides a list of countably many classes  $(\mathcal{L}_2, \{L_1\}, \{L_2\}, \dots)$  that are each uniformly generatable without requiring any elements from the adversary but their union  $\mathcal{L}_2 \cup \{L_1\} \cup \{L_2\} \cup \dots$  is not generatable. This, in particular, recovers a result of Li et al. [2024], namely their Lemma 4.3.

### 3.3 On the EUC Property and Non-Uniform Generation

Our third result resolves Question 3 as a direct consequence of our construction in Theorem 3.1.

**Theorem 3.3.** *There is an uncountable collection  $\mathcal{L}$  that is non-uniformly generatable and violates the EUC property (Definition 2.7).*

Specifically, the collection  $\mathcal{L}_1$  from Theorem 3.1 is non-uniformly generatable but violates the EUC property, providing a concrete counterexample that addresses this open question.

### 3.4 Technical Overview

In this section, we give a detailed overview of our approach; for a higher-level summary, we refer readers to Section 1.1. Our goal is to show that finite unions of generatable classes need not be generatable. Toward this, it is instructive to build some intuition about how to show that a class is *not* generatable. Recall that Kleinberg and Mullainathan [2024] showed that *any* countable collection is generatable, thus we must necessarily work with uncountable collections.

**Warm-Up: A Non-generatable Collection.** Let the domain  $\Sigma^*$  be  $\mathbb{N}$ . A natural candidate to consider is the collection of all *infinite* subsets of  $\mathbb{N}$ .<sup>5</sup> Given a generator  $\mathcal{G}$ , we will pick some  $K \in \mathcal{L}$  and enumeration of  $K$ , both tailored to  $\mathcal{G}$ , so that it makes a mistake in *every* step. Let us denote the element enumerated at step  $i \in \mathbb{N}$  by  $x_i$  and the element generated at step  $i \in \mathbb{N}$  by  $y_i = \mathcal{G}_i(x_1, \dots, x_i)$ . We begin by setting  $x_1 = 1$ . Then, for each  $k \in \mathbb{N}$  we define  $x_k = \max\{\max_{i=1, \dots, k-1} x_i, \max_{j=1, \dots, k-1} y_j\} + 1$ . We let  $K = \bigcup_{i \in \mathbb{N}} \{x_i\}$  and  $E = (x_1, x_2, \dots)$ . Notice that  $x_i \neq x_{i'}$  for  $i \neq i'$ , hence  $K$  contains infinitely many elements. Moreover,  $K \in \mathcal{L}$  and  $E$  is a valid enumeration of  $K$ .<sup>6</sup> Why does the learner make a mistake in every step? Consider two cases: at step  $i$  either the learner outputs some  $y_i \in \{x_1, \dots, x_i\}$  so it fails to output an unseen element, or it outputs some  $y_i \notin \{x_1, \dots, x_i\}$ . In the latter case, by the definition of  $E$ , all the elements we enumerate in subsequent rounds (the unseen elements of  $K$ ), are greater than  $y_i$ , which means that  $y_i$  is not an unseen element of  $K$ .

Unfortunately, the collection  $\mathcal{L}$  is very complex so it is not clear at all if it is possible to split it into two collections  $\mathcal{L}_1, \mathcal{L}_2$  such that both of them are generatable and  $\mathcal{L}_1 \cup \mathcal{L}_2 = \mathcal{L}$ . Nevertheless, this idea of constructing hard enumerations and target languages as a function of the underlying generator – a.k.a. diagonalizing against the underlying generator – will be the first ingredient towards our main

<sup>5</sup>Recall that for the problem of generation to be well-defined Kleinberg and Mullainathan [2024] require that all languages in the collection are infinite.

<sup>6</sup>In fact, it is an “easy” enumeration since it lists elements in increasing order.

338 result. Next, we explore the crucial question: Can we construct  $\mathcal{L}_1, \mathcal{L}_2$  that are individually easy to  
 339 generate from but  $\mathcal{L}_1 \cup \mathcal{L}_2$  is (almost) as complex as the previous collection?

340 **A First Attempt (which Fails).** Our first idea is to create  $\mathcal{L}_1$  and  $\mathcal{L}_2$  in a symmetric way. Both  
 341 defined over  $\mathbb{Z}$ ,  $\mathcal{L}_1$  contains languages that are “easy” on the negative integers and “hard” on the  
 342 positive integers, while  $\mathcal{L}_2$  contains languages that are “hard” on the negative integers and “easy” on  
 343 the positive integers. Taking this approach to the extreme, we define

$$\mathcal{L}_1 := \{L_A := \mathbb{Z}_- \cup A, A \subseteq \mathbb{Z}_+, |A| = \infty\} \quad \text{and} \quad \mathcal{L}_2 := \{L_B := \mathbb{Z}_+ \cup B, B \subseteq \mathbb{Z}_-, |B| = \infty\}.$$

344 In words, every language in  $\mathcal{L}_1$  contains all the negative integers and some infinite subset of the  
 345 positive integers (and for every such subset there exists a corresponding language in  $\mathcal{L}_1$ ). The  
 346 collection  $\mathcal{L}_2$  is defined in a symmetric way where the roles of positive and negative integers are  
 347 flipped. Both  $\mathcal{L}_1$  and  $\mathcal{L}_2$  are uniformly generatable in a trivial way: for  $\mathcal{L}_1$  it suffices to generate *any*  
 348 unseen negative number and symmetrically for  $\mathcal{L}_2$ .

349 Can a single generator successfully generate  $\mathcal{L}_1 \cup \mathcal{L}_2$ ? Since there is no systematic way to generate  
 350 from uncountable collections (unlike countable collections), we explore natural heuristics. Perhaps  
 351 the most intuitive approach is to track the positive and negative integers observed so far and generate  
 352 from the “heavier” side (the side with more observed elements). This approach fails: an adversary  
 353 can select a language from  $\mathcal{L}_1$  and ensure any finite prefix of the enumeration contains more positive  
 354 than negative integers – fooling the learner into generative positive integers – and, then, selecting the  
 355 set  $A$  to using our warm-up technique to force mistakes. However, a more sophisticated generator  
 356 does exist for  $\mathcal{L}_1 \cup \mathcal{L}_2$ : the generator keeps track of the longest prefix<sup>7</sup> enumerated on the positive  
 357 and negative side separately, and outputs an unseen number from the side with the longer prefix.

358 Why does this work? If  $K = \mathbb{Z}$ , then the generator is always correct. Otherwise,  $K$  either contains  
 359  $\mathbb{Z}_-$  and misses at least one element from  $\mathbb{Z}_+$  or it contains  $\mathbb{Z}_+$  and misses at least one element from  
 360  $\mathbb{Z}_-$ . In either case, since the adversary must completely enumerate  $K$  the prefix of one of the two  
 361 sides will stop growing, while the other increases indefinitely. Thus, in the limit, this generator will  
 362 output valid and unseen elements from  $K$ .

363 **An Attempt (which Works).** The core reason why our previous attempt fails is that (in the limit), a  
 364 sufficiently clever generator can identify if  $K \in \mathcal{L}_1$  or  $K \in \mathcal{L}_2$ . To get our result, we need to ensure  
 365 that no generator can make this determination. We therefore modify our collections  $\mathcal{L}_1, \mathcal{L}_2$  to make  
 366 them even more similar while keeping them individually generatable:

$$\begin{aligned} \mathcal{L}'_1 &:= \{L_{A,B} := (\mathbb{Z}_- \setminus A) \cup (\mathbb{Z}_+ \setminus B), A \subseteq \mathbb{Z}_+, |A| < \infty, B \subseteq \mathbb{Z}_-, |B| = \infty\}, \\ \mathcal{L}'_2 &:= \{L_{A,B} := (\mathbb{Z}_- \setminus A) \cup (\mathbb{Z}_+ \setminus B), A \subseteq \mathbb{Z}_+, |A| = \infty, B \subseteq \mathbb{Z}_-, |B| < \infty\}. \end{aligned}$$

367 In this construction, languages in  $\mathcal{L}'_1$  contain almost all negative integers (missing only finitely many  
 368 in  $A$ ) and only some positive integers (missing infinitely many in  $B$ ). The collection  $\mathcal{L}'_2$  is defined  
 369 symmetrically, with finite/infinite exclusions reversed. First, notice that  $\mathcal{L}'_1, \mathcal{L}'_2$  are non-uniformly  
 370 generatable in a trivial way: there exists a generator that generates from  $\mathcal{L}_1$  (and  $\mathcal{L}_2$ ) without seeing  
 371 any examples from the target language and the number of mistakes it makes depends only on  $K$ .<sup>8</sup>

372 The crux of the difficulty with the new collections is that, while they have a clear asymmetry (one side  
 373 missing finitely many elements, the other missing infinitely many), this asymmetry cannot be detected  
 374 at any finite time. Indeed, it is not hard to see that the sophisticated generator that kept track of  
 375 continuous prefixes of both positive and negative integers and generated according to the longer-prefix  
 376 side fails for  $\mathcal{L}'_1 \cup \mathcal{L}'_2$ . It turns out that *every* generator fails for the union of this pair of collections.

377 To show this, a tempting approach is to try to replicate our strategy from the warm-up construction  
 378 and force a mistake in *every* round. For instance, we can start enumerating positive integers, and if  
 379 the generator ever outputs an unseen positive number  $x_{i_1}$ , switch to enumerating negative integers  
 380 ensuring that we do not enumerate any negative number the generator has generated. Indeed,  $\mathcal{L}'_1 \cup \mathcal{L}'_2$   
 381 is sufficiently complex to ensure that for every  $t \in \mathbb{N}$  the elements  $S_t$  enumerated up to timestep  $t$  are  
 382 consistent with some language  $K_t \in \mathcal{L}$ . Unfortunately, this property does *not* imply that we present a  
 383 complete enumeration of some  $K \in \mathcal{L}$ . Indeed, it is not hard to construct generators for which the  
 384 stated approach ends up enumerating some  $\hat{K}$  that does not contain infinitely many negative integers

<sup>7</sup>A prefix of length  $i$  from  $\mathbb{Z}_-$  is the set  $\{-i, -i-1, \dots, -1\}$  and symmetrically from  $\mathbb{Z}_+$

<sup>8</sup>Indeed, for  $\mathcal{L}'_1$  the generator can start outputting negative integers in decreasing order and since any  $K$  misses only finitely many of them it will eventually start generating correctly (symmetrically for  $\mathcal{L}'_2$ .)



and infinitely many positive integers; such languages are not part of  $\mathcal{L}'_1 \cup \mathcal{L}'_2$ . Hence, to show the non-generatability of  $\mathcal{L}'_1 \cup \mathcal{L}'_2$  we must use a more involved argument.

**A Modified Diagonalization Argument.** We now present a lower bound construction that proceeds in (potentially infinitely) many phases, which are now broken into two subphases, and is tailored to the underlying generator  $\mathcal{G}$ . Let us introduce some notation: let  $S_t$  denote the elements enumerated by the adversary up to (and including) step  $t$ . We also denote by  $P_t$  the set of *positive* integers the generator has outputted up to (and including) step  $t$  and  $N_t$  set of *negative* integers the adversary has enumerated up to (and including) step  $t$ . We now describe our construction inductively:

Phase 1-A: During this phase, the adversary enumerates the negative integers starting from  $-1$  in a sequential, decreasing order  $(-1, -2, -3, \dots)$  until the generator outputs an unseen negative integer. If this never happens, the adversary ends up enumerating  $K = \mathbb{Z}_- \in \mathcal{L}'_1$  and the generator makes a mistake in every timestep, hence the adversary wins the game. Thus, let us assume that  $t_{1,A}$  is the first timestep the generator outputs an unseen negative integer. At this point, we switch to phase 1-B.

Phase 1-B: The adversary now enumerates positive integers starting from  $\max P_{t_{1,A}} + 1$  in a sequential increasing order. Let  $t_{1,B} > t_{1,A}$  the first timestep when the generator outputs a positive integer. Using similar reasoning, if this never happens, the adversary enumerates a valid language from  $\mathcal{L}'_2$  and the generator makes infinitely many mistakes. Otherwise, we proceed to phase 2.

For  $\ell \geq 2$ , the  $\ell$ -th phase follows:

Phase  $\ell$ -A: Upon entering this phase, the adversary enumerates the largest negative integer not yet enumerated, *i.e.*, the number  $\min N_t - 1$ , and in the subsequent rounds of this phase it continues in decreasing order. Importantly, some of these negative integers might coincide with elements the generator has previously outputted, thus “correcting” some of its tentative mistakes. As we explained, this is unavoidable since there are  $\mathcal{G}$  such that if the adversary forces  $\mathcal{G}$  to make a mistake in every step it necessarily enumerates a language that is not in  $\mathcal{L}'_1 \cup \mathcal{L}'_2$ . Let  $t_{\ell,A} > t_{\ell-1,B}$  be the first timestep when the generator outputs an unseen negative integer. At this point, we move to subphase  $\ell$ -B.

Phase  $\ell$ -B: Similar to subphase 1-B, the adversary enumerates positive integers starting from  $\max P_{t_{\ell,A}} + 1$  until the generator outputs a positive integer, at which point this subphase ends.

Having described the construction, we now argue its correctness. As we argued already, if the construction terminates after finitely many phases, then the learner makes infinitely many mistakes and the adversary enumerates a valid language. Alternatively if the construction proceeds for infinitely many phases, then the adversary enumerates  $\mathbb{Z}_-$  along with an infinite subset of  $\mathbb{Z}_+$ , producing a valid language from  $\mathcal{L}'_1$ . What about the generator’s mistakes? The crucial observation is that every time we move from subphase  $\ell$ -B to  $(\ell + 1)$ -A the adversary forces a mistake for the generator. With infinitely many phases, the generator necessarily makes infinitely many mistakes. The formal details are in Appendix A.1.

*Remark 3.4 (Connection to EUC).* This construction yields an additional insight: there are uncountable classes that are non-uniformly generatable (in a trivial way), yet do not satisfy the Eventually Unbounded Closure (EUC) property. Indeed, both  $\mathcal{L}'_1$  and  $\mathcal{L}'_2$  are uncountable and non-uniformly generatable, but we can prove they violate EUC (Appendix A.2), thus addressing Question 3.

*Remark 3.5 (Stronger Lower Bound).* The ideas we described in this section can be utilized to derive the stronger lower bound from Theorem 3.2. The formal details are in Appendix A.2.

## 4 Concluding Remarks

In this paper we have continued studying the emerging line of work on language generation in the limit, resolving three open questions from Li et al. [2024]. While the work of Kleinberg and Mullainathan [2024] showed a remarkable tractability of the problem when the collection of languages is *countable*, our results and the results of Li et al. [2024] show that this learning task is significantly more involved when we move to uncountable collections and exhibits behaviors that are qualitatively different from traditional learning problems such as binary classification [Valiant, 1984, Vapnik and Chervonenkis, 2015] or online learning [Littlestone, 1988]. Our results further highlight the difficulty of coming up with a *characterization* of generatability, since there are collections that are generatable (in a strong sense), yet even taking the union of two of them yields a non-generatable collection. Nevertheless, we hope that the technique we introduce to show non-generatability will help pave the way to the solution of this challenging problem.

## References

- Noga Alon, Amos Beimel, Shay Moran, and Uri Stemmer. Closure properties for private classification and online prediction. In *Conference on Learning Theory*, pages 119–152. PMLR, 2020.
- Dana Angluin. Finding patterns common to a set of strings (extended abstract). In *Proceedings of the Eleventh Annual ACM Symposium on Theory of Computing*, STOC ’79, page 130–141, New York, NY, USA, 1979. Association for Computing Machinery. ISBN 9781450374385. doi: 10.1145/800135.804406. URL <https://doi.org/10.1145/800135.804406>.
- Dana Angluin. Inductive inference of formal languages from positive data. *Information and Control*, 45(2):117–135, 1980. ISSN 0019-9958. doi: [https://doi.org/10.1016/S0019-9958\(80\)90285-5](https://doi.org/10.1016/S0019-9958(80)90285-5). URL <https://www.sciencedirect.com/science/article/pii/S0019995880902855>.
- Sanjeev Arora and Boaz Barak. *Computational Complexity: A Modern Approach*. Cambridge University Press, 2009.
- Moses Charikar and Chirag Pabbaraju. Exploring facets of language generation in the limit, 2024a. URL <https://arxiv.org/pdf/2411.15364v1>.
- Moses Charikar and Chirag Pabbaraju. Exploring facets of language generation in the limit, 2024b. URL <https://arxiv.org/pdf/2411.15364v2>.
- Tianqi Chen and Carlos Guestrin. Xgboost: A scalable tree boosting system. In *Proceedings of the 22nd ACM SIGKDD International Conference on Knowledge Discovery and Data Mining*, KDD ’16, page 785–794, New York, NY, USA, 2016. Association for Computing Machinery. ISBN 9781450342322. doi: 10.1145/2939672.2939785. URL <https://doi.org/10.1145/2939672.2939785>.
- Yoav Freund and Robert E. Schapire. Experiments with a new boosting algorithm. In *Proceedings of the Thirteenth International Conference on International Conference on Machine Learning*, ICML’96, page 148–156, San Francisco, CA, USA, 1996. Morgan Kaufmann Publishers Inc. ISBN 1558604197.
- Badi Ghazi, Noah Golowich, Ravi Kumar, and Pasin Manurangsi. Near-tight closure bounds for the littlestone and threshold dimensions. In *Algorithmic learning theory*, pages 686–696. PMLR, 2021.
- E. Mark Gold. Language identification in the limit. *Information and Control*, 10(5):447–474, 1967. ISSN 0019-9958. doi: [https://doi.org/10.1016/S0019-9958\(67\)91165-5](https://doi.org/10.1016/S0019-9958(67)91165-5). URL <https://www.sciencedirect.com/science/article/pii/S0019995867911655>.
- Alkis Kalavasis, Anay Mehrotra, and Grigoris Veleghkas. Characterizations of language generation with breadth, 2024. URL <https://arxiv.org/abs/2412.18530>.
- Alkis Kalavasis, Anay Mehrotra, and Grigoris Veleghkas. On the limits of language generation: Trade-offs between hallucination and mode collapse. In *Proceedings of the 57th Annual ACM Symposium on Theory of Computing (STOC’25)*, New York, NY, USA, 2025. Association for Computing Machinery. URL <https://arxiv.org/abs/2411.09642>.
- Amin Karbasi, Omar Montasser, John Sous, and Grigoris Veleghkas. (im)possibility of automated hallucination detection in large language models, 2025. URL <https://arxiv.org/abs/2504.17004>.
- Jon Kleinberg and Sendhil Mullainathan. Language generation in the limit. In *Advances in Neural Information Processing Systems*, volume 37, 2024. URL <https://arxiv.org/abs/2404.06757>.
- Jon Kleinberg and Fan Wei. Density measures for language generation, 2025. URL <https://arxiv.org/abs/2504.14370>.
- Jiaxun Li, Vinod Raman, and Ambuj Tewari. Generation through the lens of learning theory, 2024. URL <https://arxiv.org/abs/2410.13714>.

- 484 Nick Littlestone. Learning quickly when irrelevant attributes abound: A new linear-threshold  
 485 algorithm. *Machine Learning*, 2(4):285–318, 1988. doi: 10.1007/BF00116827. URL <https://doi.org/10.1007/BF00116827>.  
 486
- 487 Charlotte Peale, Vinod Raman, and Omer Reingold. Representative language generation. In *Forty-*  
 488 *second International Conference on Machine Learning*, 2025.
- 489 Ananth Raman and Vinod Raman. Generation from noisy examples. In *Forty-second International*  
 490 *Conference on Machine Learning*, 2025.
- 491 Robert E. Schapire. *The Boosting Approach to Machine Learning: An Overview*, pages 149–  
 492 171. Springer New York, New York, NY, 2003. ISBN 978-0-387-21579-2. doi: 10.1007/  
 493 978-0-387-21579-2\_9. URL [https://doi.org/10.1007/978-0-387-21579-2\\_9](https://doi.org/10.1007/978-0-387-21579-2_9).
- 494 Leslie G Valiant. A theory of the learnable. *Commun. ACM*, 27(11):1134–1142, 11 1984. ISSN  
 495 0001-0782. doi: 10.1145/1968.1972. URL <https://doi.org/10.1145/1968.1972>.
- 496 Aad Van Der Vaart and Jon A Wellner. A note on bounds for vc dimensions. *Institute of Mathematical*  
 497 *Statistics collections*, 5:103, 2009.
- 498 V. N. Vapnik and A. Ya. Chervonenkis. *On the Uniform Convergence of Relative Frequencies of*  
 499 *Events to Their Probabilities*, pages 11–30. Springer International Publishing, Cham, 2015. ISBN  
 500 978-3-319-21852-6. doi: 10.1007/978-3-319-21852-6\_3. URL [https://doi.org/10.1007/](https://doi.org/10.1007/978-3-319-21852-6_3)  
 501 [978-3-319-21852-6\\_3](https://doi.org/10.1007/978-3-319-21852-6_3).

## NeurIPS Paper Checklist

### 1. Claims

Question: Do the main claims made in the abstract and introduction accurately reflect the paper's contributions and scope?

Answer: [\[Yes\]](#)

Justification: We provide proofs of the claims we make in the abstract.

Guidelines:

- The answer NA means that the abstract and introduction do not include the claims made in the paper.
- The abstract and/or introduction should clearly state the claims made, including the contributions made in the paper and important assumptions and limitations. A No or NA answer to this question will not be perceived well by the reviewers.
- The claims made should match theoretical and experimental results, and reflect how much the results can be expected to generalize to other settings.
- It is fine to include aspirational goals as motivation as long as it is clear that these goals are not attained by the paper.

### 2. Limitations

Question: Does the paper discuss the limitations of the work performed by the authors?

Answer: [\[Yes\]](#)

Justification: We discuss how our results operate in a stylized mathematical model and how a complete characterization of learnability within this model is still lacking.

Guidelines:

- The answer NA means that the paper has no limitation while the answer No means that the paper has limitations, but those are not discussed in the paper.
- The authors are encouraged to create a separate "Limitations" section in their paper.
- The paper should point out any strong assumptions and how robust the results are to violations of these assumptions (e.g., independence assumptions, noiseless settings, model well-specification, asymptotic approximations only holding locally). The authors should reflect on how these assumptions might be violated in practice and what the implications would be.
- The authors should reflect on the scope of the claims made, e.g., if the approach was only tested on a few datasets or with a few runs. In general, empirical results often depend on implicit assumptions, which should be articulated.
- The authors should reflect on the factors that influence the performance of the approach. For example, a facial recognition algorithm may perform poorly when image resolution is low or images are taken in low lighting. Or a speech-to-text system might not be used reliably to provide closed captions for online lectures because it fails to handle technical jargon.
- The authors should discuss the computational efficiency of the proposed algorithms and how they scale with dataset size.
- If applicable, the authors should discuss possible limitations of their approach to address problems of privacy and fairness.
- While the authors might fear that complete honesty about limitations might be used by reviewers as grounds for rejection, a worse outcome might be that reviewers discover limitations that aren't acknowledged in the paper. The authors should use their best judgment and recognize that individual actions in favor of transparency play an important role in developing norms that preserve the integrity of the community. Reviewers will be specifically instructed to not penalize honesty concerning limitations.

### 3. Theory assumptions and proofs

Question: For each theoretical result, does the paper provide the full set of assumptions and a complete (and correct) proof?

Answer: [\[Yes\]](#)

Justification: We have defined precisely the mathematical model under which our results hold and have given proof sketches of the approaches to get the results.

Guidelines:

- The answer NA means that the paper does not include theoretical results.
- All the theorems, formulas, and proofs in the paper should be numbered and cross-referenced.
- All assumptions should be clearly stated or referenced in the statement of any theorems.
- The proofs can either appear in the main paper or the supplemental material, but if they appear in the supplemental material, the authors are encouraged to provide a short proof sketch to provide intuition.
- Inversely, any informal proof provided in the core of the paper should be complemented by formal proofs provided in appendix or supplemental material.
- Theorems and Lemmas that the proof relies upon should be properly referenced.

#### 4. Experimental result reproducibility

Question: Does the paper fully disclose all the information needed to reproduce the main experimental results of the paper to the extent that it affects the main claims and/or conclusions of the paper (regardless of whether the code and data are provided or not)?

Answer: [NA]

Justification: No experiments are included.

Guidelines:

- The answer NA means that the paper does not include experiments.
- If the paper includes experiments, a No answer to this question will not be perceived well by the reviewers: Making the paper reproducible is important, regardless of whether the code and data are provided or not.
- If the contribution is a dataset and/or model, the authors should describe the steps taken to make their results reproducible or verifiable.
- Depending on the contribution, reproducibility can be accomplished in various ways. For example, if the contribution is a novel architecture, describing the architecture fully might suffice, or if the contribution is a specific model and empirical evaluation, it may be necessary to either make it possible for others to replicate the model with the same dataset, or provide access to the model. In general, releasing code and data is often one good way to accomplish this, but reproducibility can also be provided via detailed instructions for how to replicate the results, access to a hosted model (e.g., in the case of a large language model), releasing of a model checkpoint, or other means that are appropriate to the research performed.
- While NeurIPS does not require releasing code, the conference does require all submissions to provide some reasonable avenue for reproducibility, which may depend on the nature of the contribution. For example
  - (a) If the contribution is primarily a new algorithm, the paper should make it clear how to reproduce that algorithm.
  - (b) If the contribution is primarily a new model architecture, the paper should describe the architecture clearly and fully.
  - (c) If the contribution is a new model (e.g., a large language model), then there should either be a way to access this model for reproducing the results or a way to reproduce the model (e.g., with an open-source dataset or instructions for how to construct the dataset).
  - (d) We recognize that reproducibility may be tricky in some cases, in which case authors are welcome to describe the particular way they provide for reproducibility. In the case of closed-source models, it may be that access to the model is limited in some way (e.g., to registered users), but it should be possible for other researchers to have some path to reproducing or verifying the results.

#### 5. Open access to data and code

Question: Does the paper provide open access to the data and code, with sufficient instructions to faithfully reproduce the main experimental results, as described in supplemental material?

608 Answer: [NA]  
 609 Justification: No data or code is used.  
 610 Guidelines:

- 611 • The answer NA means that paper does not include experiments requiring code.
- 612 • Please see the NeurIPS code and data submission guidelines (<https://nips.cc/public/guides/CodeSubmissionPolicy>) for more details.
- 613 • While we encourage the release of code and data, we understand that this might not be possible, so “No” is an acceptable answer. Papers cannot be rejected simply for not including code, unless this is central to the contribution (e.g., for a new open-source benchmark).
- 614 • The instructions should contain the exact command and environment needed to run to reproduce the results. See the NeurIPS code and data submission guidelines (<https://nips.cc/public/guides/CodeSubmissionPolicy>) for more details.
- 615 • The authors should provide instructions on data access and preparation, including how to access the raw data, preprocessed data, intermediate data, and generated data, etc.
- 616 • The authors should provide scripts to reproduce all experimental results for the new proposed method and baselines. If only a subset of experiments are reproducible, they should state which ones are omitted from the script and why.
- 617 • At submission time, to preserve anonymity, the authors should release anonymized versions (if applicable).
- 618 • Providing as much information as possible in supplemental material (appended to the paper) is recommended, but including URLs to data and code is permitted.

619  
 620  
 621  
 622  
 623  
 624  
 625  
 626  
 627  
 628  
 629

630 **6. Experimental setting/details**

631 Question: Does the paper specify all the training and test details (e.g., data splits, hyperparameters, how they were chosen, type of optimizer, etc.) necessary to understand the results?  
 632  
 633 Answer: [NA]  
 634 Justification: The paper does not include experiments.  
 635 Guidelines:

- 636 • The answer NA means that the paper does not include experiments.
- 637 • The experimental setting should be presented in the core of the paper to a level of detail that is necessary to appreciate the results and make sense of them.
- 638 • The full details can be provided either with the code, in appendix, or as supplemental material.

639  
 640

641 **7. Experiment statistical significance**

642 Question: Does the paper report error bars suitably and correctly defined or other appropriate information about the statistical significance of the experiments?  
 643  
 644 Answer: [NA]  
 645 Justification: Justification: The paper does not include experiments.  
 646 Guidelines:

- 647 • The answer NA means that the paper does not include experiments.
- 648 • The authors should answer "Yes" if the results are accompanied by error bars, confidence intervals, or statistical significance tests, at least for the experiments that support the main claims of the paper.
- 649 • The factors of variability that the error bars are capturing should be clearly stated (for example, train/test split, initialization, random drawing of some parameter, or overall run with given experimental conditions).
- 650 • The method for calculating the error bars should be explained (closed form formula, call to a library function, bootstrap, etc.)
- 651 • The assumptions made should be given (e.g., Normally distributed errors).
- 652 • It should be clear whether the error bar is the standard deviation or the standard error of the mean.

653  
 654  
 655  
 656  
 657  
 658

- It is OK to report 1-sigma error bars, but one should state it. The authors should preferably report a 2-sigma error bar than state that they have a 96% CI, if the hypothesis of Normality of errors is not verified.
- For asymmetric distributions, the authors should be careful not to show in tables or figures symmetric error bars that would yield results that are out of range (e.g. negative error rates).
- If error bars are reported in tables or plots, The authors should explain in the text how they were calculated and reference the corresponding figures or tables in the text.

## 8. Experiments compute resources

Question: For each experiment, does the paper provide sufficient information on the computer resources (type of compute workers, memory, time of execution) needed to reproduce the experiments?

Answer: [NA]

Justification: Justification: The paper does not include experiments.

Guidelines:

- The answer NA means that the paper does not include experiments.
- The paper should indicate the type of compute workers CPU or GPU, internal cluster, or cloud provider, including relevant memory and storage.
- The paper should provide the amount of compute required for each of the individual experimental runs as well as estimate the total compute.
- The paper should disclose whether the full research project required more compute than the experiments reported in the paper (e.g., preliminary or failed experiments that didn't make it into the paper).

## 9. Code of ethics

Question: Does the research conducted in the paper conform, in every respect, with the NeurIPS Code of Ethics <https://neurips.cc/public/EthicsGuidelines>?

Answer: [Yes]

Justification: We have followed the code of ethics.

Guidelines:

- The answer NA means that the authors have not reviewed the NeurIPS Code of Ethics.
- If the authors answer No, they should explain the special circumstances that require a deviation from the Code of Ethics.
- The authors should make sure to preserve anonymity (e.g., if there is a special consideration due to laws or regulations in their jurisdiction).

## 10. Broader impacts

Question: Does the paper discuss both potential positive societal impacts and negative societal impacts of the work performed?

Answer: [NA]

Justification: The work is theoretical and the results hold under a mathematical model.

Guidelines:

- The answer NA means that there is no societal impact of the work performed.
- If the authors answer NA or No, they should explain why their work has no societal impact or why the paper does not address societal impact.
- Examples of negative societal impacts include potential malicious or unintended uses (e.g., disinformation, generating fake profiles, surveillance), fairness considerations (e.g., deployment of technologies that could make decisions that unfairly impact specific groups), privacy considerations, and security considerations.
- The conference expects that many papers will be foundational research and not tied to particular applications, let alone deployments. However, if there is a direct path to any negative applications, the authors should point it out. For example, it is legitimate to point out that an improvement in the quality of generative models could be used to generate deepfakes for disinformation. On the other hand, it is not needed to point out that a generic algorithm for optimizing neural networks could enable people to train models that generate Deepfakes faster.

- 712 • The authors should consider possible harms that could arise when the technology is being  
713 used as intended and functioning correctly, harms that could arise when the technology is  
714 being used as intended but gives incorrect results, and harms following from (intentional or  
715 unintentional) misuse of the technology.
- 716 • If there are negative societal impacts, the authors could also discuss possible mitigation  
717 strategies (e.g., gated release of models, providing defenses in addition to attacks, mecha-  
718 nisms for monitoring misuse, mechanisms to monitor how a system learns from feedback  
719 over time, improving the efficiency and accessibility of ML).

## 720 11. Safeguards

721 Question: Does the paper describe safeguards that have been put in place for responsible release  
722 of data or models that have a high risk for misuse (e.g., pretrained language models, image  
723 generators, or scraped datasets)?

724 Answer: [NA]

725 Justification: We do not release any models or data.

726 Guidelines:

- 727 • The answer NA means that the paper poses no such risks.
- 728 • Released models that have a high risk for misuse or dual-use should be released with  
729 necessary safeguards to allow for controlled use of the model, for example by requiring  
730 that users adhere to usage guidelines or restrictions to access the model or implementing  
731 safety filters.
- 732 • Datasets that have been scraped from the Internet could pose safety risks. The authors  
733 should describe how they avoided releasing unsafe images.
- 734 • We recognize that providing effective safeguards is challenging, and many papers do not  
735 require this, but we encourage authors to take this into account and make a best faith effort.

## 736 12. Licenses for existing assets

737 Question: Are the creators or original owners of assets (e.g., code, data, models), used in the  
738 paper, properly credited and are the license and terms of use explicitly mentioned and properly  
739 respected?

740 Answer: [NA]

741 Justification: We do not use such assets.

742 Guidelines:

- 743 • The answer NA means that the paper does not use existing assets.
- 744 • The authors should cite the original paper that produced the code package or dataset.
- 745 • The authors should state which version of the asset is used and, if possible, include a URL.
- 746 • The name of the license (e.g., CC-BY 4.0) should be included for each asset.
- 747 • For scraped data from a particular source (e.g., website), the copyright and terms of service  
748 of that source should be provided.
- 749 • If assets are released, the license, copyright information, and terms of use in the package  
750 should be provided. For popular datasets, [paperswithcode.com/datasets](https://paperswithcode.com/datasets) has curated  
751 licenses for some datasets. Their licensing guide can help determine the license of a dataset.
- 752 • For existing datasets that are re-packaged, both the original license and the license of the  
753 derived asset (if it has changed) should be provided.
- 754 • If this information is not available online, the authors are encouraged to reach out to the  
755 asset's creators.

## 756 13. New assets

757 Question: Are new assets introduced in the paper well documented and is the documentation  
758 provided alongside the assets?

759 Answer: [NA]

760 Justification: We do not release new assets.

761 Guidelines:

- 762 • The answer NA means that the paper does not release new assets.



763 • Researchers should communicate the details of the dataset/code/model as part of their sub-  
764 missions via structured templates. This includes details about training, license, limitations,  
765 etc.

766 • The paper should discuss whether and how consent was obtained from people whose asset  
767 is used.

768 • At submission time, remember to anonymize your assets (if applicable). You can either  
769 create an anonymized URL or include an anonymized zip file.

770 **14. Crowdsourcing and research with human subjects**

771 Question: For crowdsourcing experiments and research with human subjects, does the paper  
772 include the full text of instructions given to participants and screenshots, if applicable, as well as  
773 details about compensation (if any)?

774 Answer: [NA]

775 Justification: No such study was conducted for the paper.

776 Guidelines:

777 • The answer NA means that the paper does not involve crowdsourcing nor research with  
778 human subjects.

779 • Including this information in the supplemental material is fine, but if the main contribution  
780 of the paper involves human subjects, then as much detail as possible should be included in  
781 the main paper.

782 • According to the NeurIPS Code of Ethics, workers involved in data collection, curation, or  
783 other labor should be paid at least the minimum wage in the country of the data collector.

784 **15. Institutional review board (IRB) approvals or equivalent for research with human subjects**

785 Question: Does the paper describe potential risks incurred by study participants, whether such  
786 risks were disclosed to the subjects, and whether Institutional Review Board (IRB) approvals (or  
787 an equivalent approval/review based on the requirements of your country or institution) were  
788 obtained?

789 Answer: [NA]

790 Justification: The paper does not involve such experiments.

791 Guidelines:

792 • The answer NA means that the paper does not involve crowdsourcing nor research with  
793 human subjects.

794 • Depending on the country in which research is conducted, IRB approval (or equivalent)  
795 may be required for any human subjects research. If you obtained IRB approval, you should  
796 clearly state this in the paper.

797 • We recognize that the procedures for this may vary significantly between institutions and  
798 locations, and we expect authors to adhere to the NeurIPS Code of Ethics and the guidelines  
799 for their institution.

800 • For initial submissions, do not include any information that would break anonymity (if  
801 applicable), such as the institution conducting the review.

802 **16. Declaration of LLM usage**

803 Question: Does the paper describe the usage of LLMs if it is an important, original, or non-  
804 standard component of the core methods in this research? Note that if the LLM is used only for  
805 writing, editing, or formatting purposes and does not impact the core methodology, scientific  
806 rigorousness, or originality of the research, declaration is not required.

807 Answer: [NA]

808 Justification: We only used LLMs for text editing.

809 Guidelines:

810 • The answer NA means that the core method development in this research does not involve  
811 LLMs as any important, original, or non-standard components.

812 • Please refer to our LLM policy (<https://neurips.cc/Conferences/2025/LLM>) for  
813 what should or should not be described.

814  
815

---

---

## Supplementary Material For “On Union-Closedness of Language Generation”

---

---

816 **Contents**

|     |                                                                        |           |
|-----|------------------------------------------------------------------------|-----------|
| 817 | <b>1 Introduction</b>                                                  | <b>1</b>  |
| 818 | 1.1 Our Contributions . . . . .                                        | 3         |
| 819 | 1.2 Related Work . . . . .                                             | 4         |
| 820 | <b>2 Preliminaries</b>                                                 | <b>5</b>  |
| 821 | <b>3 Our Results and Technical Overview</b>                            | <b>6</b>  |
| 822 | 3.1 Non-Closure Under Finite Unions . . . . .                          | 6         |
| 823 | 3.2 On Finite Union of Non-Uniformly Generatable Collections . . . . . | 6         |
| 824 | 3.3 On the EUC Property and Non-Uniform Generation . . . . .           | 7         |
| 825 | 3.4 Technical Overview . . . . .                                       | 7         |
| 826 | <b>4 Concluding Remarks</b>                                            | <b>9</b>  |
| 827 | <b>A Proofs</b>                                                        | <b>19</b> |
| 828 | A.1 Proof of Theorem 3.1 . . . . .                                     | 19        |
| 829 | A.2 Proof of Theorem 3.2 . . . . .                                     | 20        |
| 830 | A.3 Proof of Theorem 3.3 . . . . .                                     | 22        |
| 831 | <b>B Formal Lower Bound of Non-Generatability</b>                      | <b>22</b> |
| 832 | <b>C Extensions to a Family of Constructions</b>                       | <b>24</b> |

## A Proofs

### A.1 Proof of Theorem 3.1

In this section, we prove Theorem 3.1. We first state a more detailed version of the theorem.

**Theorem A.1.** *Let  $\Sigma^* = \mathbb{Z}$  and  $\mathcal{L} = \mathcal{L}_1 \cup \mathcal{L}_2$  where*

$$\begin{aligned}\mathcal{L}_1 &:= \{L_{A,B} := (\mathbb{Z}_- \setminus A) \cup (\mathbb{Z}_+ \setminus B), A \subseteq \mathbb{Z}_-, |A| < \infty, B \subseteq \mathbb{Z}_+, |B| = \infty\}, \\ \mathcal{L}_2 &:= \{L_{A,B} := (\mathbb{Z}_- \setminus A) \cup (\mathbb{Z}_+ \setminus B), A \subseteq \mathbb{Z}_-, |A| = \infty, B \subseteq \mathbb{Z}_+, |B| < \infty\}.\end{aligned}$$

*Then,  $\mathcal{L}_1, \mathcal{L}_2$  are trivially non-uniformly generatable and  $\mathcal{L}$  is not generatable.*

*Proof.* Notice that every language  $L_{A,B}$  in  $\mathcal{L}_1$  contains all the negative integers except for the finite set  $A$  and all of the positive integers except for the infinite set  $B$ . The languages in  $\mathcal{L}_2$  are defined symmetrically. Hence, the algorithm can generate from  $\mathcal{L}_2$  without observing any input samples simply by just omitting increasing prefixes of the positive integers (symmetrically for  $\mathcal{L}_2$ ).

He next show that  $\mathcal{L} = \mathcal{L}_1 \cup \mathcal{L}_2$  is not generatable.

Assume, towards a contradiction, that there exists a deterministic generating algorithm

$$\mathcal{G} = (\mathcal{G}_1, \mathcal{G}_2, \dots)$$

that generates from  $\mathcal{L}$  in the limit. We now describe an adversarial strategy that constructs an enumeration  $E = \{w_1, w_2, \dots\}$  of a target language  $K \in \mathcal{L}$  such that the generator makes infinitely many mistakes.

To simplify the notation define the following sets:

- $S_t^+$  and  $S_t^-$  denote the sets of positive and negative numbers enumerated up to time  $t$ , respectively, i.e.,  $S_t^+ = \{w_1, \dots, w_t\} \cap \mathbb{Z}_+$ ,  $S_t^- = \{w_1, \dots, w_t\} \cap \mathbb{Z}_-$ ;
- $P_t$  be the set of positive integers outputted by the generator in rounds 1 through  $t$ .

The adversary's construction is organized into *phases*, each divided into two subphases.

**Phase 1.** This phase is divided into two sub-phases.

1. **Subphase 1-A:** In every round  $t$ , the adversary enumerates the positive integer  $t$ , i.e.,

$$w_t = t.$$

This subphase continues as long as the generator's output, given the current prefix  $(1, 2, \dots, t)$ , is *not* an integer greater than  $t$ . If there is a first round  $t$  for which

$$\mathcal{G}_t(1, 2, \dots, t) \in \mathbb{Z}_+ \setminus \{1, \dots, t\},$$

then subphase 1-A ends, and we move to Subphase 1-B. If the generator never deviates (i.e., never outputs an integer greater than  $\{1, \dots, t\}$ ), then the enumeration  $E = \{1, 2, 3, \dots\}$  is complete for the language  $K = \mathbb{N}$ , and  $\mathbb{N} \in \mathcal{L}_2$ . Moreover, by definition, the generator makes infinitely many mistakes (because it never produces an unseen element of  $K$ ).

2. **Subphase 1-B:** Let  $t_1$  denote the first time step at which we enter this subphase. In every round  $t$  that we are in this phase, the adversary enumerates the negative integer

$$w_t = -t - t_1 - 1.$$

This subphase continues until the first time  $t$  at which the generator outputs a negative number that is *smaller* than the current  $w_t$ , i.e.,

$$\mathcal{G}_t(S_t) \in \mathbb{Z}_- \quad \text{and} \quad \mathcal{G}_t(S_t) < w_t.$$

If no such round occurs, then the final enumeration  $E$  will be complete for some  $K \in \mathcal{L}_1$ , since it consists of all negative integers and a finite number of positive integers, and the generator will have made infinitely many mistakes.

867 **Phase  $k$  ( $k \geq 2$ ).** After the end of Subphase  $(k-1)$ -B, the adversary alternates the strategy as follows:

868 1. **Subphase  $k$ -A:** Let  $t_k$  be the first time of Subphase  $k$ -A. The adversary first enumerates a fresh  
869 positive number defined by

$$p_k = 1 + \max\{x : x \in S_{t_k}^+ \cup P_{t_k}\}.$$

870 Then, in every round  $t = t_k, t_k + 1, \dots$  during this subphase, the adversary enumerates

$$w_t = p_k + (t - t_k),$$

871 thereby listing an increasing sequence of fresh positive numbers. This subphase ends when, for  
872 the first time, the generator outputs a positive number (given the current prefix) that exceeds the  
873 maximum of the current enumerated positives. An identical argument to the one we used for  
874 subphase 1-A shows that if this subphase never terminates, then the generator makes infinitely  
875 many mistakes and the adversary gives a complete enumeration of a language from  $\mathcal{L}_2$ .

876 2. **Subphase  $k$ -B:** After completing Subphase  $k$ -A, the adversary enters Subphase  $k$ -B. In every  
877 round during this subphase, the adversary enumerates the number

$$w_t = \min S_t^- - 1,$$

878 introducing a fresh negative number. This subphase ends at the first round when the generator  
879 outputs a negative number that is less than  $w_t$ . An identical argument to the one we used for  
880 subphase 1-B shows that if this subphase never terminates, then the generator makes infinitely  
881 many mistakes and the adversary gives a complete enumeration of a language from  $\mathcal{L}_1$ .

882 Let us now assume that infinitely many of the phases are executed. Then, the target language is  
883  $K = \mathbb{Z}_- \cup A$ , where  $A \subset \mathbb{N}$ , is determined by the elements enumerated during the subphases  $k$ -A,  
884  $k \in \mathbb{N}$ , hence it is a valid language from  $\mathcal{L}_1$ . Moreover, notice that every time we transition from  
885 subphase  $k$ -B to  $(k+1)$ -A, then the generator makes a mistake because the element it outputted is  
886 not included in the constructed enumeration.

887 Since there are infinitely many phases, and in each phase the generator is forced to err at least once,  
888 the deterministic generating algorithm makes infinitely many mistakes. This contradicts the definition  
889 of generation in the limit.  $\square$

890 **Remark A.2** (Language Identification Is Not Closed under Finite Unions Either). It is worth high-  
891 lighting that identification in the limit is not closed under finite unions either and it exhibits a very  
892 similar behavior: there is a finite collection  $\mathcal{L}_1$  that is trivially uniformly identifiable and a countable  
893 collection  $\mathcal{L}_2$  that is trivially non-uniformly identifiable such that  $\mathcal{L}_1 \cup \mathcal{L}_2$  is not identifiable in the  
894 limit. To see that, let  $\mathcal{L}_1 = \{\mathbb{N}\}$  and  $\mathcal{L}_2 = \{l_i := \{1, \dots, i\}, i \in \mathbb{N}\}$ .

## 895 A.2 Proof of Theorem 3.2

896 We first restate a more detailed version of the theorem for completeness.

897 **Theorem A.3.** Let  $\Sigma^* = \mathbb{Z}$  and let  $\mathcal{L} = \mathcal{L}_1 \cup \mathcal{L}_2$  where

$$\begin{aligned} \mathcal{L}_1 &= \{L_A := \mathbb{Z}_- \cup A : A \subseteq \mathbb{Z}_+\} \\ \mathcal{L}_2 &= \{\mathbb{N}, L_{i,B} := \{-i, \dots, -1\} \cup (\mathbb{Z}_+ \setminus B) : i \in \mathbb{N}, B \subseteq \mathbb{Z}_+, |B| < \infty\}. \end{aligned}$$

898 Then,

- 899 •  $\mathcal{L}_1$  is uncountable and trivially uniformly generatable,
- 900 •  $\mathcal{L}_2$  is countable and trivially non-uniformly generatable, and
- 901 • no deterministic generating algorithm  $\mathcal{G} = (\mathcal{G}_1, \mathcal{G}_2, \dots)$  can generate from  $\mathcal{L}$  in the limit.

902 *Proof.* Notice that every language  $L_A$  in  $\mathcal{L}_1$  contains all the negative integers and some subset  $A$   
903 of the positive integers. Hence,  $\cap_{L \in \mathcal{L}_1} L = \mathbb{Z}_-$ , which implies that an algorithm can generate from  
904  $\mathcal{L}_1$  without using any input samples, by simply outputting negative integers. Regarding  $\mathcal{L}_2$ , notice  
905 that every language  $L_{i,B}$  contains the first  $i$  negative integers and all positive integers except for  
906 the finite set  $B$ . We claim that for any such language  $L_{i,B}$ , the algorithm that just outputs number

907  $\{1, 2, \dots\}$  achieves generation in the limit, without requiring any input samples from  $L_{i,B}$ . To  
 908 see that, notice that since  $B$  is finite it has some maximum element, denoted by  $x_B$ . Notice that  
 909  $(\mathbb{Z}_+ \setminus \{1, \dots, x_B\}) \subseteq L_{i,B}$ . Thus, at timestep  $t = x_B + 1$  the algorithm will generate a valid element  
 910 and will keep generating valid elements from that point on. Hence,  $\mathcal{L}_2$  is trivially non-uniformly  
 911 generatable. He next show that  $\mathcal{L} = \mathcal{L}_1 \cup \mathcal{L}_2$  is not generatable.

912 Assume, towards a contradiction, that there exists a deterministic generating algorithm

$$\mathcal{G} = (\mathcal{G}_1, \mathcal{G}_2, \dots)$$

913 that generates from  $\mathcal{L}$  in the limit. We now describe an adversarial strategy that constructs an  
 914 enumeration  $E = \{w_1, w_2, \dots\}$  of a target language  $K \in \mathcal{L}$  such that the generator makes infinitely  
 915 many mistakes.

916 For clarity, let:

- 917 •  $S_t^+$  and  $S_t^-$  denote the sets of positive and negative numbers enumerated up to time  $t$ , respec-
- 918 tively, *i.e.*,  $S_t^+ = \{w_1, \dots, w_t\} \cap \mathbb{Z}_+$ ,  $S_t^- = \{w_1, \dots, w_t\} \cap \mathbb{Z}_-$ ;
- 919 •  $P_t$  be the set of positive integers outputted by the generator in rounds 1 through  $t$ .

920 The adversary's construction is organized into *phases*, each divided into two subphases.

### 921 **Phase 1.**

922 1. **Subphase 1-A:** In every round  $t$ , the adversary enumerates the positive integer  $t$ , *i.e.*,

$$w_t = t.$$

923 This subphase continues as long as the generator's output, given the current prefix  $(1, 2, \dots, t)$ ,  
 924 is *not* an integer greater than  $t$ . If there is a first round  $t$  for which

$$\mathcal{G}_t(1, 2, \dots, t) \in \mathbb{Z}_+ \setminus \{1, \dots, t\},$$

925 then subphase 1-A ends, and we move to Subphase 1-B. If the generator never deviates (*i.e.*,  
 926 never outputs an integer greater than  $\{1, \dots, t\}$ ), then the enumeration  $E = \{1, 2, 3, \dots\}$  is  
 927 complete for the language  $K = \mathbb{N}$ , and  $\mathbb{N} \in \mathcal{L}_2$ . Moreover, by definition, the generator makes  
 928 infinitely many mistakes (because it never produces an unseen element of  $K$ ).

929 2. **Subphase 1-B:** Let  $t_1$  denote the first time step at which we enter this subphase. In every round  
 930  $t$  that we are in this phase, the adversary enumerates the negative integer

$$w_t = -t - t_1 - 1.$$

931 This subphase continues until the first time  $t$  at which the generator outputs a negative number  
 932 that is *smaller* than the current  $w_t$ , *i.e.*,

$$\mathcal{G}_t(S_t) \in \mathbb{Z}_- \quad \text{and} \quad \mathcal{G}_t(S_t) < w_t.$$

933 If no such round occurs, then the final enumeration  $E$  will be complete for some  $K \in \mathcal{L}_1$ , since  
 934 it consists of all negative integers and a finite number of positive integers, and the generator will  
 935 have made infinitely many mistakes.

936 **Phase  $k$  ( $k \geq 2$ ).** After the end of Subphase  $(k-1)$ -B, the adversary alternates the strategy as follows:

937 1. **Subphase  $k$ -A:**

- 938 • Let  $t_k$  be the first time of Subphase  $k$ -A. The adversary first enumerates a fresh positive  
 939 number defined by

$$p_k = 1 + \max\{x : x \in S_{t_k}^+ \cup P_{t_k}\}.$$

- 940 • Then, in every round  $t = t_k, t_k + 1, \dots$  during this subphase, the adversary enumerates

$$w_t = p_k + (t - t_k),$$

941 thereby listing an increasing sequence of fresh positive numbers.

942 • This subphase ends when, for the first time, the generator outputs a positive number (given  
 943 the current prefix) that exceeds the maximum of the current enumerated positives. An  
 944 identical argument to the one we used for subphase 1-A shows that if this subphase never  
 945 terminates, then the generator makes infinitely many mistakes and the adversary gives a  
 946 complete enumeration of a language from  $\mathcal{L}_2$ .

## 947 2. Subphase $k$ -B:

948 • After completing Subphase  $k$ -A, the adversary enters Subphase  $k$ -B. In every round during  
 949 this subphase, the adversary enumerates the number

$$w_t = \min S_t^- - 1,$$

950 introducing a fresh negative number.

951 • This subphase ends at the first round when the generator outputs a negative number that  
 952 is less than  $w_t$ . An identical argument to the one we used for subphase 1-B shows that if  
 953 this subphase never terminates, then the generator makes infinitely many mistakes and the  
 954 adversary gives a complete enumeration of a language from  $\mathcal{L}_1$ .

955 Let us now assume that infinitely many of the phases are executed. Then, the target language is  
 956  $K = \mathbb{Z}_- \cup A$ , where  $A \subset \mathbb{N}$ , is determined by the elements enumerated during the subphases  $k$ -A,  
 957  $k \in \mathbb{N}$ , hence it is a valid language. Moreover, notice that every time we transition from subphase  
 958  $k$ -B to  $(k+1)$ -A, then the generator makes a mistake because the element it outputted is not included  
 959 in the constructed enumeration.

960 Since there are infinitely many phases, and in each phase the generator is forced to err at least once,  
 961 the deterministic generating algorithm makes infinitely many mistakes. This contradicts the definition  
 962 of generation in the limit.  $\square$

## 963 A.3 Proof of Theorem 3.3

964 In this section, we prove Theorem 3.3. We begin by stating a more detailed version of Theorem 3.3.

965 **Theorem A.4.** *Let  $\Sigma^* = \mathbb{Z}$  and let*

$$\mathcal{L} := \{L_A := (\mathbb{Z}_- \setminus A), A \subseteq \mathbb{Z}_-, |A| < \infty\}.$$

966 *Then,  $\mathcal{L}$  is trivially non-uniformly generatable but it does not satisfy the EUC property.*

967 *Proof.* To see that  $\mathcal{L}$  is trivially non-uniformly generatable notice that, since every  $K \in \mathcal{L}$  omits only  
 968 finitely many negative integers the algorithm that in every round  $t$  generates the largest element from  
 969 the set  $O_t = \{i \in \mathbb{Z}_-, i \leq -t, i \notin S_t\}$  generates in the limit. In fact, this algorithm generates in the  
 970 limit in the modified setting where  $S_t = \emptyset$  for all rounds  $t$ , hence it is trivially uniformly generatable.

971 We now show that  $\mathcal{L}$  does not satisfy the EUC property. Consider any target language  $K$  and  $S_t$   
 972 any set of elements of  $K$ . Consider the induced version space  $V(\mathcal{L}, S_t)$ , i.e., the set of languages  
 973 from  $\mathcal{L}$  containing  $S_t$ . Assume that  $\cap_{L \in V(\mathcal{L}, S_t)} L \neq S_t$  for some  $t$ . Then, there exists some  
 974  $x_t \in \cap_{L \in V(\mathcal{L}, S_t)} L$  such that  $x_t \notin S_t$ . Consider the language  $L = \mathbb{Z}_- \setminus \{x_t\}$ . Then,  $S_t \subseteq L$  and  
 975  $x_t \notin L$ , hence this show that  $\cap_{L \in V(\mathcal{L}, S_t)} L = S_t$  (violating the EUC property).  $\square$

## 976 B Formal Lower Bound of Non-Generatability

977 In this section we show formally that the class of all infinite languages over  $\mathbb{N}$  is not generatable in  
 978 the limit. It is worth mentioning that this result follows from a result of Li et al. [2024]. Here, we  
 979 give a simpler proof which also generalizes to *randomized* learners (Proposition B.2).

980 **Proposition B.1.** *Let  $\Sigma^* = \mathbb{N}$  and  $\mathcal{L}$  be the set of all infinite subsets of  $\mathbb{N}$ . Then, no deterministic  
 981 algorithm can generate from  $\mathcal{L}$  in the limit.*

982 *Proof.* Let  $\mathcal{G} = (\mathcal{G}_n: \mathbb{N}^n \rightarrow \mathbb{N})_{n \in \mathbb{N}}$  be a deterministic generating algorithm and, for each  $n$ , let  
 983  $\mathcal{G}_n(x_1, x_2, \dots, x_n)$  be the string outputted by  $\mathcal{G}_n$  when provided the strings  $x_1, x_2, \dots, x_n$  as input.  
 984 We will show that there is a language  $K \in \mathcal{L}$  and an enumeration  $E$  of  $K$ , both of which depend on

985  $\mathcal{G}$ , for which  $\mathcal{G}$  fails to generate from  $K$  in the limit. We will construct the enumeration and the target  
 986 language inductively. For all  $n \in \mathbb{N}$ , we denote by  $E_n$  the first  $n$  elements of  $E$ .

987 Let  $x_1 = 1$  and  $E_1 = (1)$ . We then define  $x_2 = \max\{x_1, \mathcal{G}_1(x_1)\} + 1$  and  
 988  $E_2 = (x_1, x_2)$ . Continuing in the same fashion, for any  $n \in \mathbb{N}$ , we define  $x_n =$   
 989  $\max\{\max_{j < n} x_j, \max_{j < n} \mathcal{G}_j(x_1, \dots, x_j)\} + 1$  and  $E_n = (x_1, \dots, x_n)$ . Lastly, we let  $K =$   
 990  $\cup_{n \in \mathbb{N}} x_n$ .

991 First, notice that since  $x_i \neq x_j, \forall i, j \in \mathbb{N}, i \neq j$ , it holds that  $|K| = \infty$ , hence  $K \in \mathcal{L}$ . Moreover,  
 992 notice that  $E$  is a valid enumeration of  $K$ . Finally, notice that for every  $n \in \mathbb{N}$ , the algorithm either  
 993 outputs a number that does not belong to  $K$  or a number that has already been enumerated. To prove  
 994 that formally, it suffices to show that for all  $n \in \mathbb{N}$  it holds that  $\mathcal{G}_n(x_1, \dots, x_n) \notin \{x_{n+1}, x_{n+2}, \dots\}$ .  
 995 This follows by two observations: for all  $n \in \mathbb{N}$  it holds that  $x_{n+1} > \mathcal{G}_n(x_1, \dots, x_n)$  and  $x_{n+1+j} >$   
 996  $x_{n+1}, \forall j \in \mathbb{N}$ .

997 □

998 It is natural to consider whether randomization can help circumvent the result of Proposition B.1.  
 999 Our next result shows that this is not the case.

1000 **Proposition B.2.** *Let  $\Sigma^* = \mathbb{N}$  and  $\mathcal{L}$  be the set of all infinite subsets of  $\mathbb{N}$ . Then, for every randomized*  
 1001 *algorithm  $\mathcal{G} = (\mathcal{G}_n: \mathbb{N}^n \rightarrow \Delta(\mathbb{N}))_{n \in \mathbb{N}}$  there exists a language  $K \in \mathcal{L}$  and an enumeration  $E$  of  $K$*   
 1002 *such that, with probability 1,  $\mathcal{G}$  will produce unseen elements of  $K$  only finitely many times.*

1003 *Proof.* Let  $\mathcal{G} = (\mathcal{G}_n: \mathbb{N}^n \rightarrow \Delta(\mathbb{N}))_{n \in \mathbb{N}}$  be a (potentially randomized) generating algorithm. We will  
 1004 show that there is a language  $K \in \mathcal{L}$  and an enumeration  $E$  of  $K$ , both of which depend on  $\mathcal{G}$ , for  
 1005 which  $\mathcal{G}$  fails to generate from  $K$  in the limit, with probability 1. We will construct the enumeration  
 1006 and the target language inductively. For all  $n \in \mathbb{N}$ , we denote by  $E_n$  the first  $n$  elements of  $E$ .

1007 Let  $x_1 = 1$  and  $E_1 = (1)$ . For any  $n \in \mathbb{N}, n \geq 2$  we define the random variable

$$X_n := \max \left\{ \max_{j < n} x_j, \max_{j < n} \mathcal{G}_j(x_1, \dots, x_j) \right\},$$

1008 and we let

$$x_n := \min \left\{ j \in \mathbb{N}: \Pr[X_n \geq j] \leq \frac{1}{n^2} \right\}.$$

1009 We also define  $E_n := (x_1, \dots, x_n)$  and  $K = \cup_{n \in \mathbb{N}} x_n$ .

1010 First, notice that, with probability 1,  $x_i \neq x_j, \forall i, j \in \mathbb{N}, i \neq j$ , hence it holds that  $|K| = \infty$ , thus  
 1011  $K \in \mathcal{L}$ . Moreover, notice that  $E$  is a valid enumeration of  $K$ . Next, we argue that with probability 1,  
 1012 the algorithm outputs unseen elements of  $K$  only finitely many times. For all  $n \in \mathbb{N}$ , let  $\mathcal{E}_n$  be the  
 1013 event that  $\mathcal{G}_n(x_1, \dots, x_n) \in K \setminus \{x_1, \dots, x_n\}$ . Notice that, by definition of the enumeration  $E$  and  
 1014 the target language  $K$ ,

$$\Pr[\mathcal{E}_n] = \Pr[\mathcal{G}_n(x_1, \dots, x_n) \in \{x_{n+1}, x_{n+2}, \dots\}].$$

1015 Moreover, since with probability 1,  $x_{n+1} < x_{n+2} < \dots$ , it holds that

$$\Pr[\mathcal{G}_n(x_1, \dots, x_n) \in \{x_{n+1}, x_{n+2}, \dots\}] \leq 1 - \Pr[\mathcal{G}_n(x_1, \dots, x_n) < x_{n+1}].$$

1016 By definition of  $x_{n+1}$  it holds that

$$\Pr[\mathcal{G}_n(x_1, \dots, x_n) < x_{n+1}] \geq 1 - \frac{1}{(n+1)^2}.$$

1017 Chaining the previous inequalities, we get

$$\Pr[\mathcal{E}_n] \leq \frac{1}{(n+1)^2},$$

1018 thus,

$$\sum_{n \in \mathbb{N}} \Pr[\mathcal{E}_n] < \infty.$$

1019 By the Borel–Cantelli lemma we deduce that with probability 1 only finitely many of the events  
 1020  $\{\mathcal{E}_n\}_{n \in \mathbb{N}}$  will occur.

1021 □

## 1022 C Extensions to a Family of Constructions

1023 We first explain some high-level properties of our lower bound construction and illustrate how they  
 1024 can be used to show non-generatability in other settings. In our construction, we can split the  
 1025 underlying collection  $\mathcal{L}$  into two parts, say  $\mathcal{L}_1, \mathcal{L}_2$  that allow for the following lower bound argument:  
 1026 the adversary can start enumerating some language  $L_1$  from  $\mathcal{L}_1$ , if at some point the generator  
 1027 generates an unseen element of  $L_1$  the adversary moves to enumerating a language  $L_2$  from  $\mathcal{L}_2$ , and  
 1028 then if the generator generates unseen elements of  $L_2$  the adversary moves back again to enumerating  
 1029 some language  $L_3$  of  $\mathcal{L}_1$ . Crucially, the adversary can ensure that when switching from  $\mathcal{L}_2$  to  $\mathcal{L}_1$  the  
 1030 generator makes a mistake, and if there are infinitely many switches the adversary enumerates some  
 1031 language  $L_\infty$  that is in the collection.

1032 To illustrate the generality of these conditions, we present another family of language collections  
 1033  $\mathcal{L}_1, \mathcal{L}_2, \dots, \mathcal{L}_\infty$  that are individually generatable, but whose union is not generatable. Let the domain  
 1034 be  $\mathcal{X} = \mathbb{N} \times \mathbb{N}$ . Fix an index  $i \in \mathbb{N}$ . We begin by defining  $\mathcal{L}_i$ . Each language  $L \in \mathcal{L}_i$  is parameterized  
 1035 by  $i$  finite subsets  $A_{-1}, A_1, A_2, \dots, A_{i-1}$ :

$$(A_{-1}, A_1, \dots, A_{i-1} : |A_{-1}|, |A_1|, \dots, |A_{i-1}| < \infty \text{ and } A_{-1}, A_1, \dots, A_{i-1} \subseteq \mathbb{N}) .$$

1036 Given the finite sets  $A_{-1}, A_1, A_2, \dots, A_{i-1} \subseteq \mathbb{N}$ , the corresponding language  $L$  in  $\mathcal{L}_i$  is defined as  
 1037 follows:

$$L = \left( \bigcup_{k=1}^{i-1} \bigcup_{\ell \in A_i} \{(k, \ell)\} \right) \cup \bigcup_{j=1}^{\infty} \{(i, j)\} \cup \bigcup_{\ell \in A_{-1}} \{(-1, \ell)\} .$$

1038 Next, we define  $\mathcal{L}_\infty$ : Each language  $L \in \mathcal{L}_\infty$  is parameterized by a countable collection of finite  
 1039 subsets

$$(A_{-1}, A_1, A_2, \dots : |A_{-1}|, |A_1|, |A_2|, \dots < \infty \text{ and } A_{-1}, A_1, A_2, \dots \subseteq \mathbb{N}) .$$

1040 Given finite sets  $A_{-1}, A_1, A_2, \dots \subseteq \mathbb{N}$ , the corresponding language  $L$  in  $\mathcal{L}_\infty$  is defined as follows

$$L = \left( \bigcup_{k=1}^{\infty} \bigcup_{\ell \in A_i} \{(k, \ell)\} \right) \cup \bigcup_{\ell \notin A_{-1}} \{(-1, \ell)\} .$$

1041 Note that the last union is over elements  $\ell$  not belonging to  $A_{-1}$ . Hence, each language in  $\mathcal{L}_\infty$ ,  
 1042 contains all but finitely many elements of the form  $(-1, j)$  (for  $j \in \mathbb{N}$ ). This, in particular, ensures  
 1043 that  $\mathcal{L}_\infty$  can be trivially generated: e.g., it suffices to output element  $(-1, t)$  in the  $t$ -th iteration.

1044 *Remark C.1.* Consider the collection  $\mathcal{L} = \bigcup_{i=1}^{\infty} \mathcal{L}_i \cup \mathcal{L}_\infty$ . Having described this collection, it is not  
 1045 hard to show that a direct adaptation of our approach in the main result goes through. We can group  
 1046 these collections in a natural way, e.g., by having  $\mathcal{L}_\infty, \mathcal{L}_1, \mathcal{L}_3, \mathcal{L}_5, \dots$ , in one group and  $\mathcal{L}_2, \mathcal{L}_4, \dots$ ,  
 1047 in the other. Then, the lower bound follows by picking an enumeration that alternates between these  
 1048 two collections, as described above.
